# Supplementary material for: Potential of using CO 2 observations over India in regional carbon budget estimation by improving the modelling system
Source: Copernicus journal article supplement (doi:10.5194/egusphere-2023-1582), 2023-08-10
Supplement: Supplementary file 1 [file egusphere-2023-1582-supplement.pdf]

*Supplement of*

**Potential of using CO<sub>2</sub> observations over India in regional carbon budget estimation by improving the modelling system**

**Vishnu Thilakan et al.**

*Correspondence to:* Dhanyalekshmi Pillai (dhanya@iiserb.ac.in, kdhanya@bgc-jena.mpg.de)

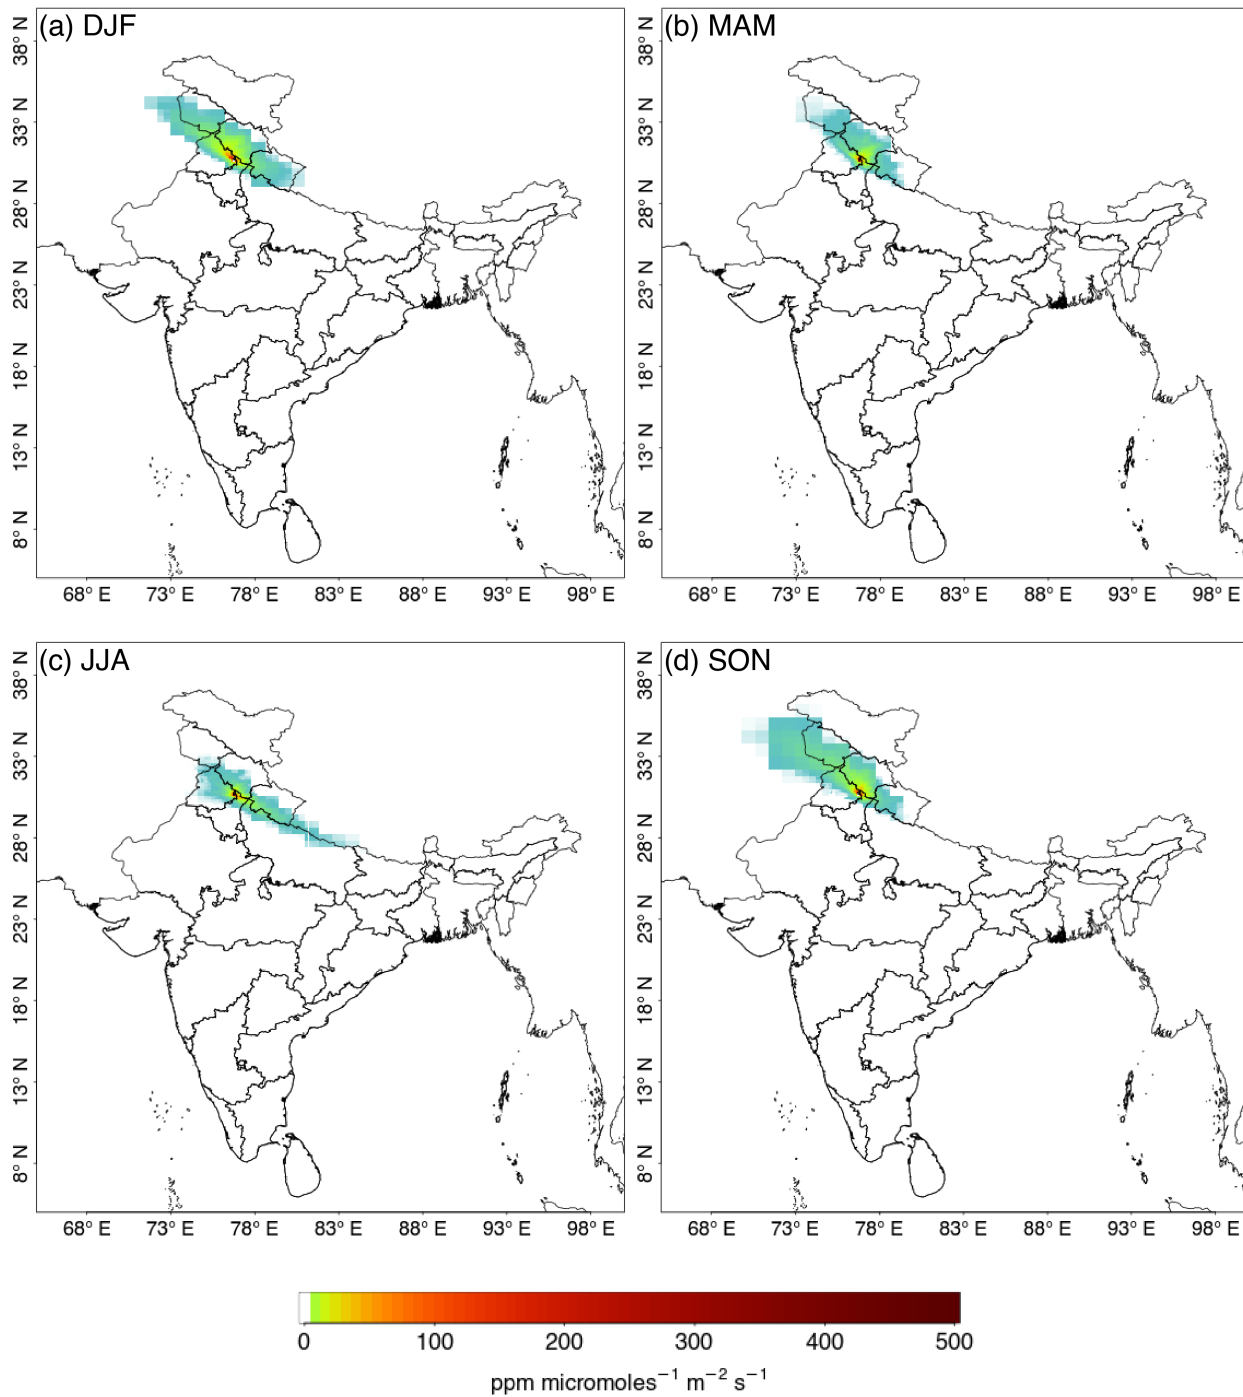

**Figure S1.** Seasonally integrated STILT footprints for Mohali (MHL) during 2017. (a) Winter (b) Pre-Monsoon (c) Monsoon (d) Post-Monsoon

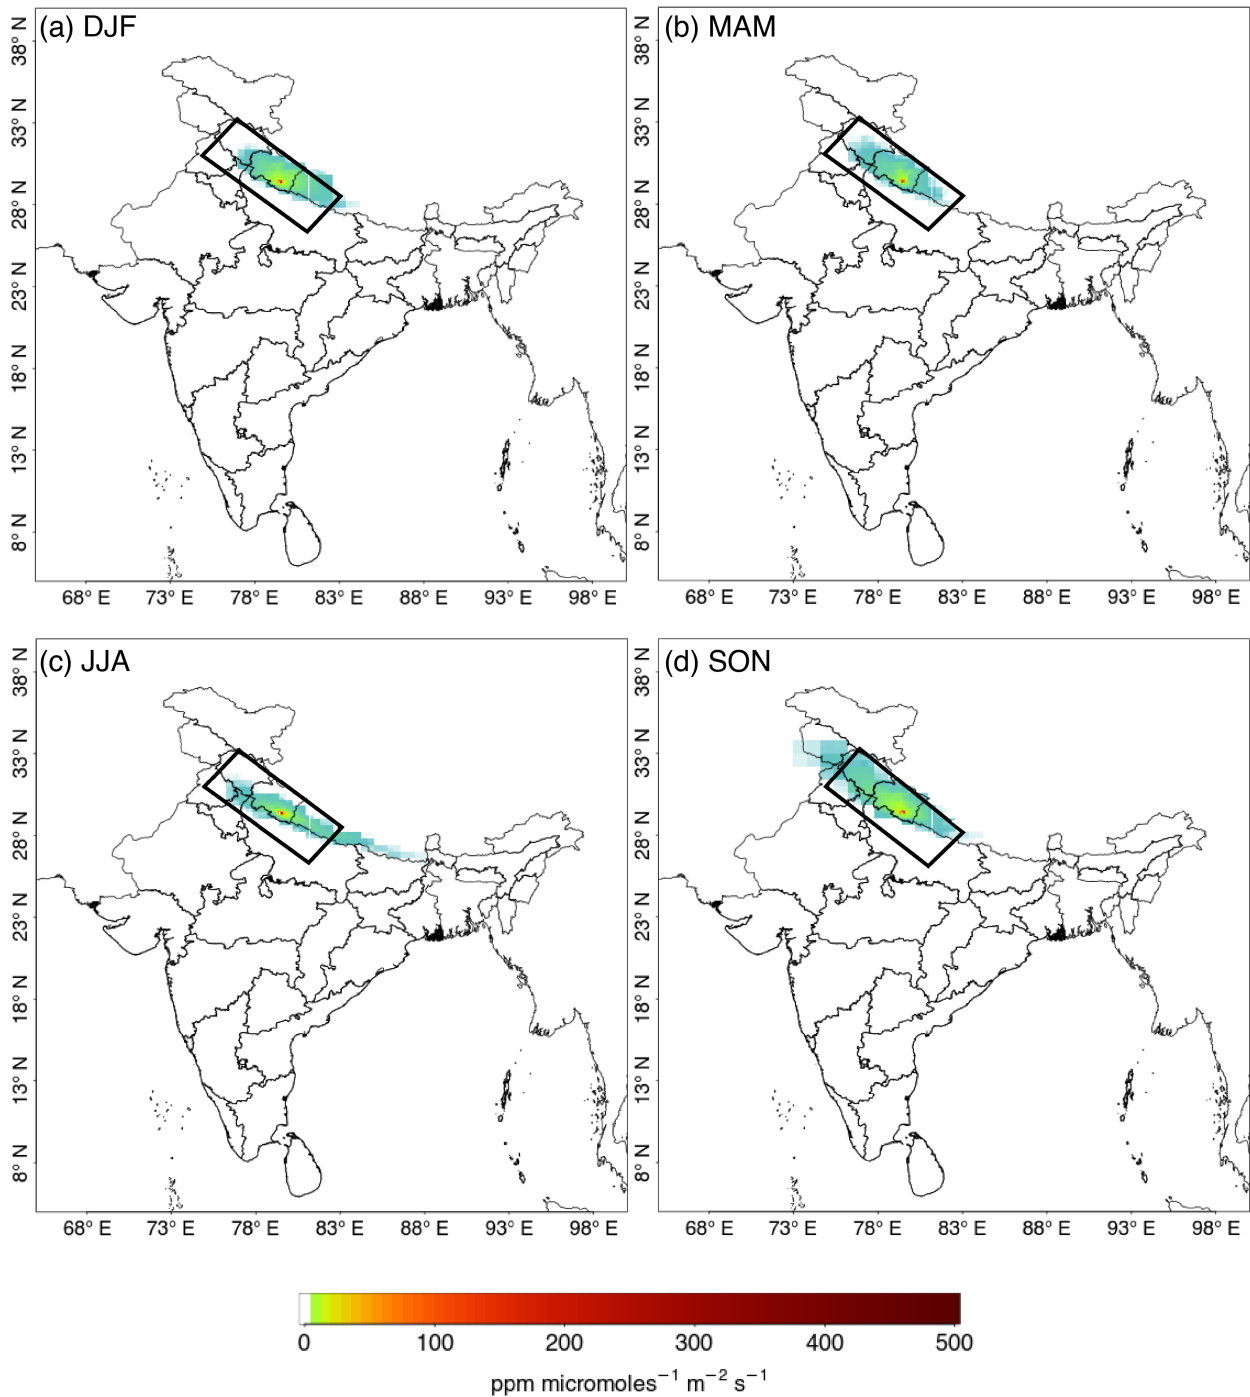

**Figure S2.** Seasonally integrated STILT footprints for Nainital (NTL) during 2017. The marked region represents the area used for the MODIS NDVI analysis. (a) Winter (b) Pre-Monsoon (c) Monsoon (d) Post-Monsoon

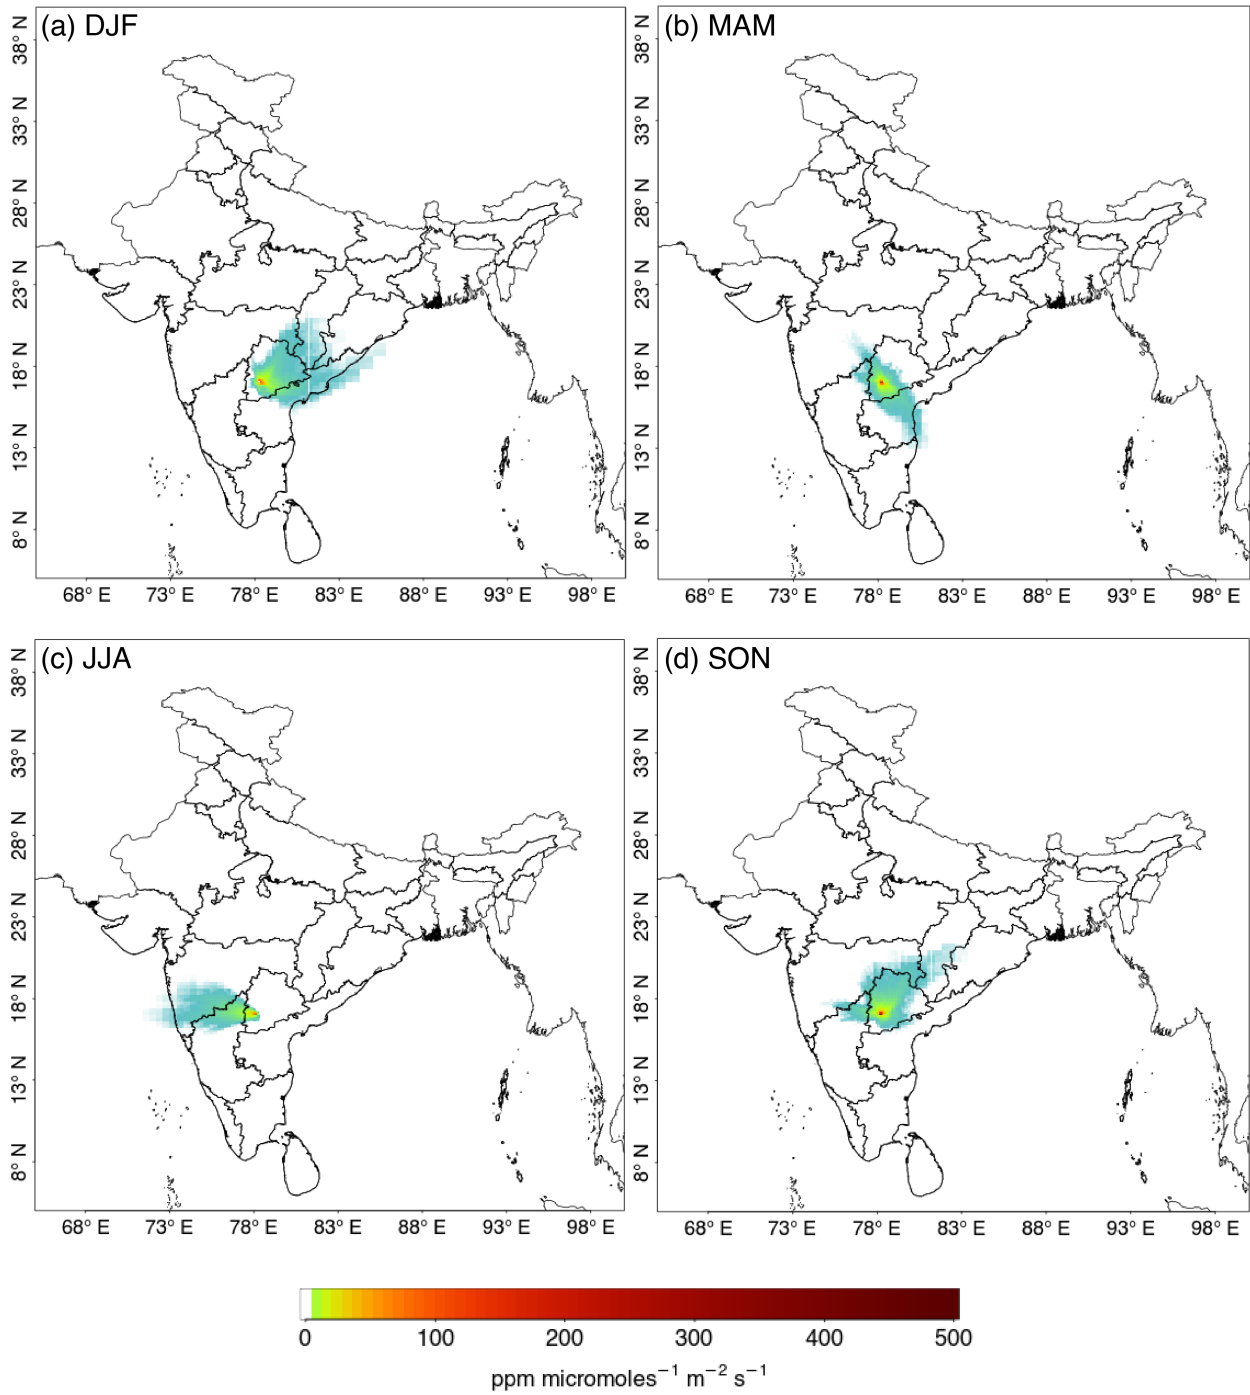

**Figure S3.** Seasonally integrated STILT footprints for Shadnagar (SDN) during 2017. (a) Winter (b) Pre-Monsoon (c) Monsoon (d) Post-Monsoon

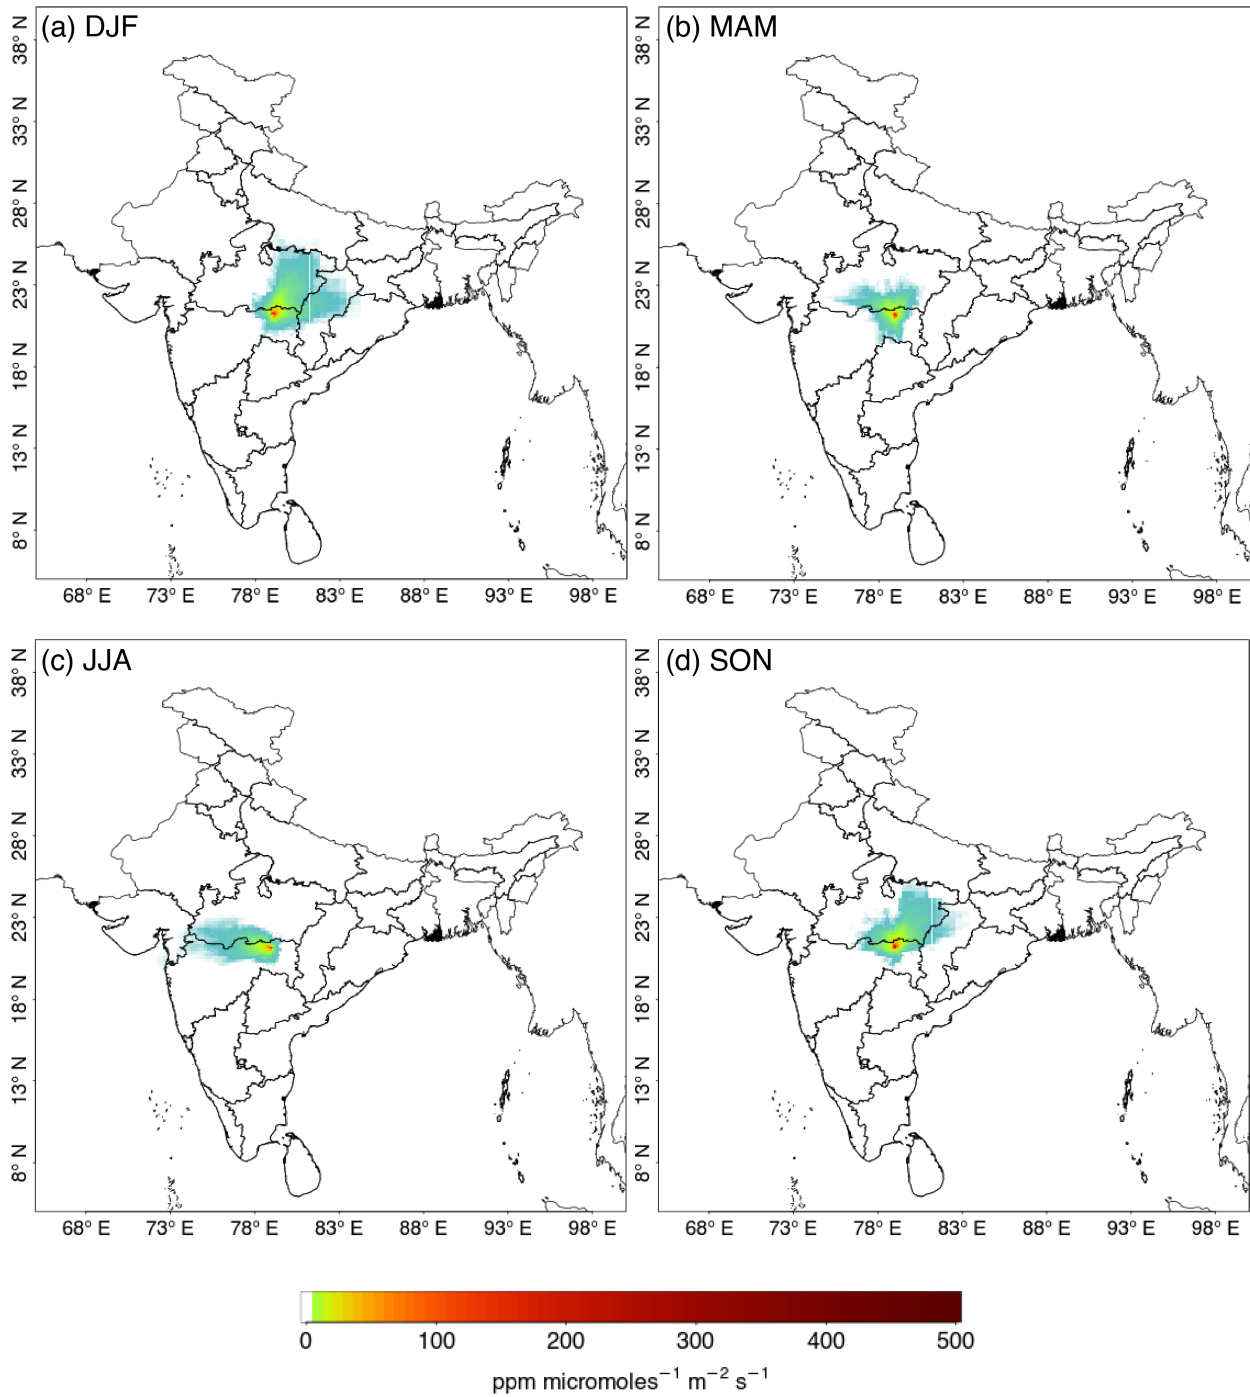

**Figure S4.** Seasonally integrated STILT footprints for Nagpur (NGP) during 2017. (a) Winter (b) Pre-Monsoon (c) Monsoon (d) Post-Monsoon

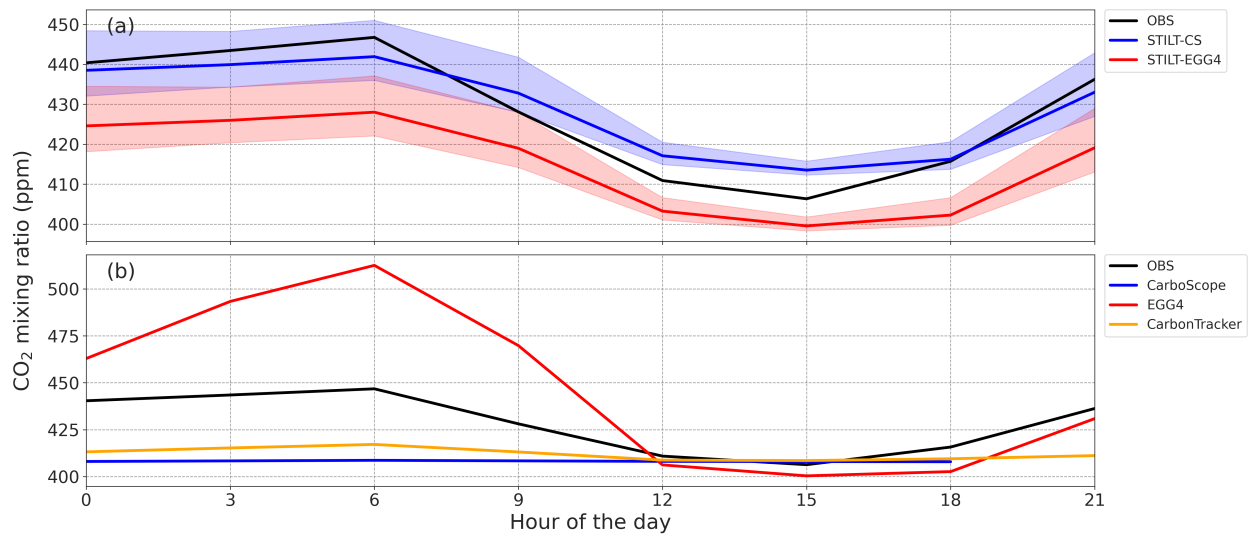

**Figure S5.** Time series of CO<sub>2</sub> diurnal cycle over MHL during 2017 is shown in comparison with (a) STILT simulations. Blue (STILT-CS) and red (STILT-EGG4) curves represent the ensemble average of the STILT simulations using different anthropogenic fluxes. Shaded regions represent the range of the model simulations. (b) Global reanalysis products. Note that STILT provides output only every three hours. Similarly, EGG4 and CarbonTracker provide outputs at a three-hour resolution and CarboScope at a six-hour resolution.

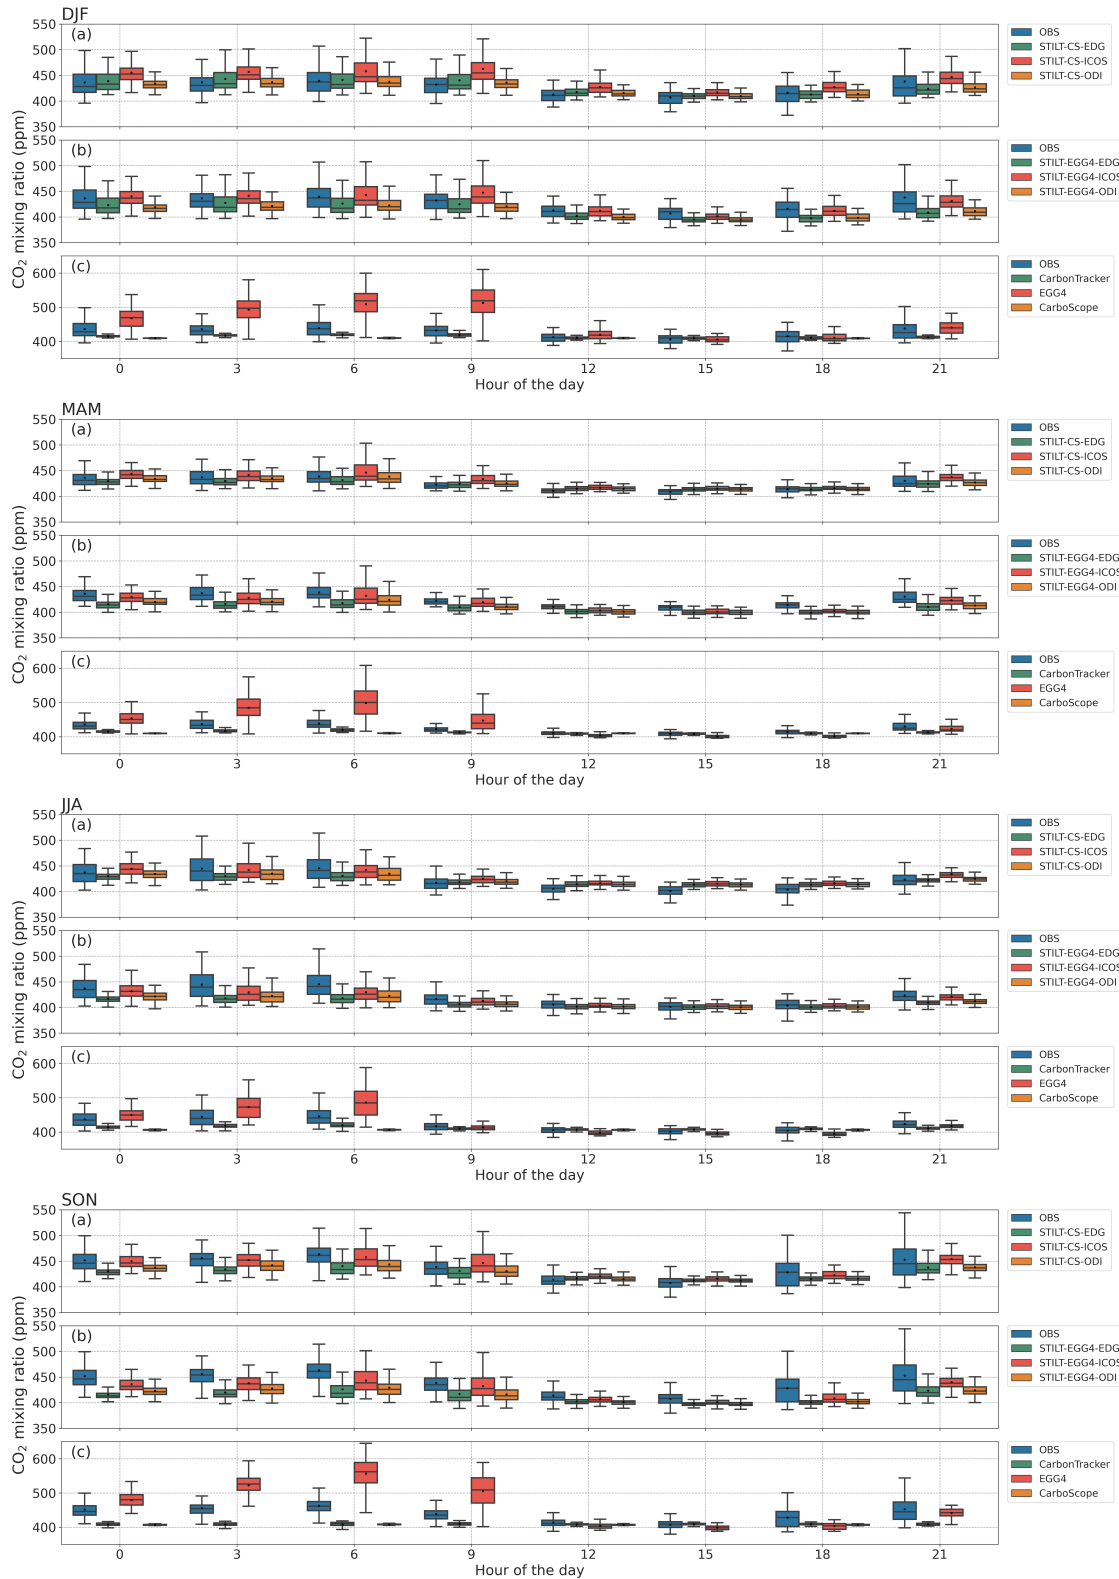

**Figure S6.** CO<sub>2</sub> diurnal cycle over MHL for different seasons during 2017 is shown in comparison with (a) STILT-CS simulations, (b) STILT-EGG4 simulations and (c) global reanalysis products. Note that STILT provides output only every three hours. Similarly, EGG4 and CarbonTracker provide outputs at a three-hour resolution and CarboScope at a six-hour resolution.

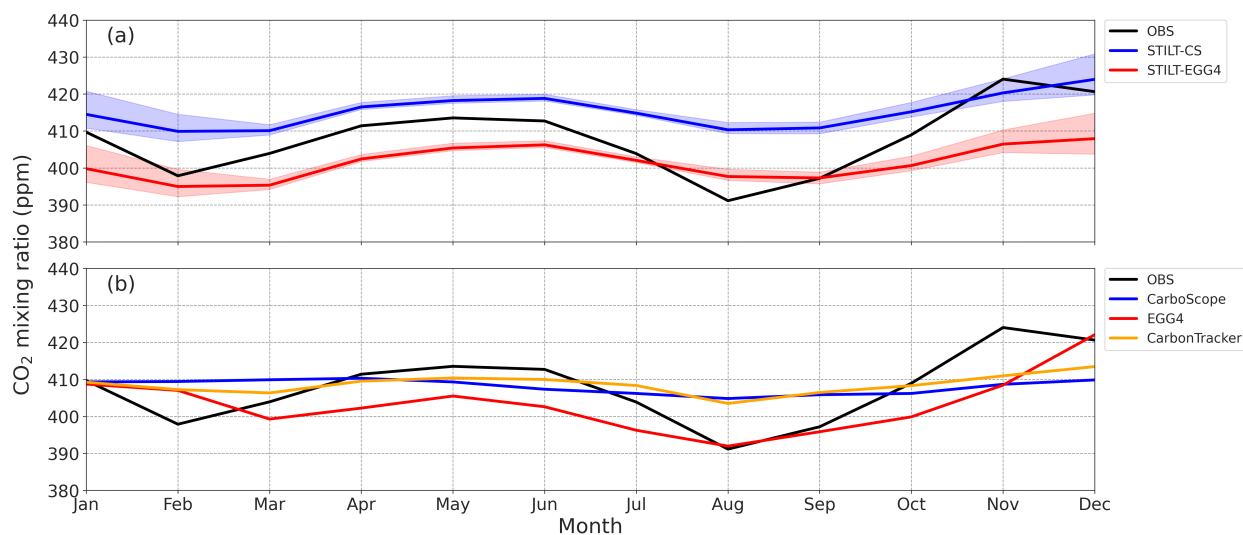

**Figure S7.** CO<sub>2</sub> seasonal cycle over MHL during 2017. Time series of monthly mean CO<sub>2</sub> (daytime, 11:00-16:00 local time) over MHL with (a) STILT simulations. Blue (STILT-CS) and red (STILT-EGG4) curves represent the ensemble average of the STILT simulations using different anthropogenic fluxes. Shaded regions represent the range of the model simulations. (b) Monthly mean CO<sub>2</sub> (daytime, 11:00-16:00 local time) over MHL in comparison with Global reanalysis products.

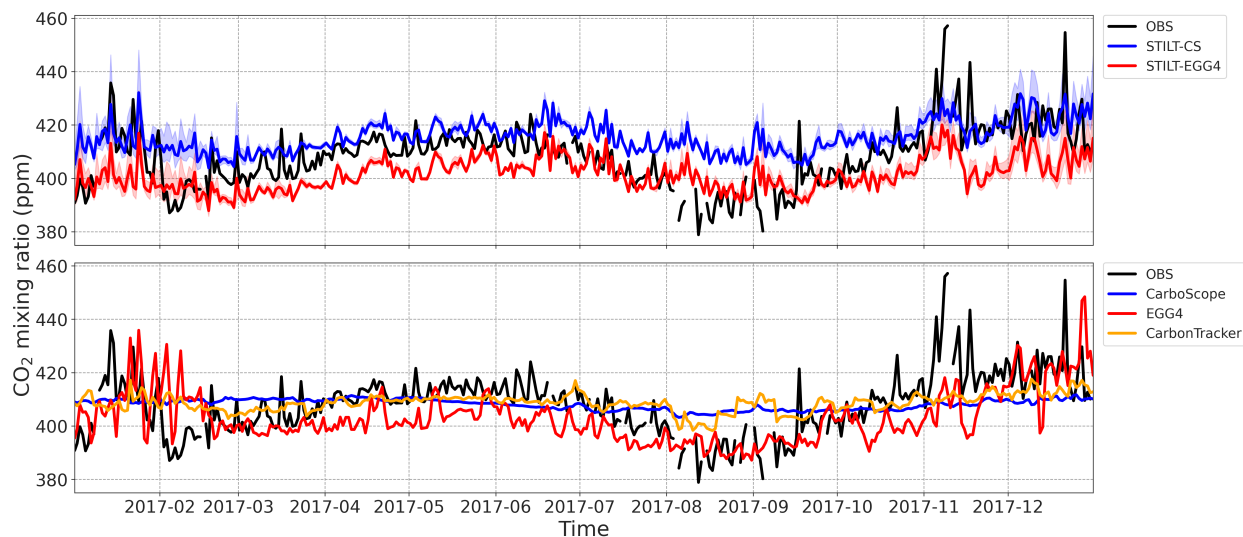

**Figure S8.** CO<sub>2</sub> daytime (11:00-16:00 local time) average time series from MHL during 2017 with (a) STILT simulations. Blue (STILT-CS) and red (STILT-EGG4) curves represent the ensemble average of the STILT simulations using different anthropogenic fluxes. Shaded regions represent the range of the model simulations. (b) Global reanalysis products.



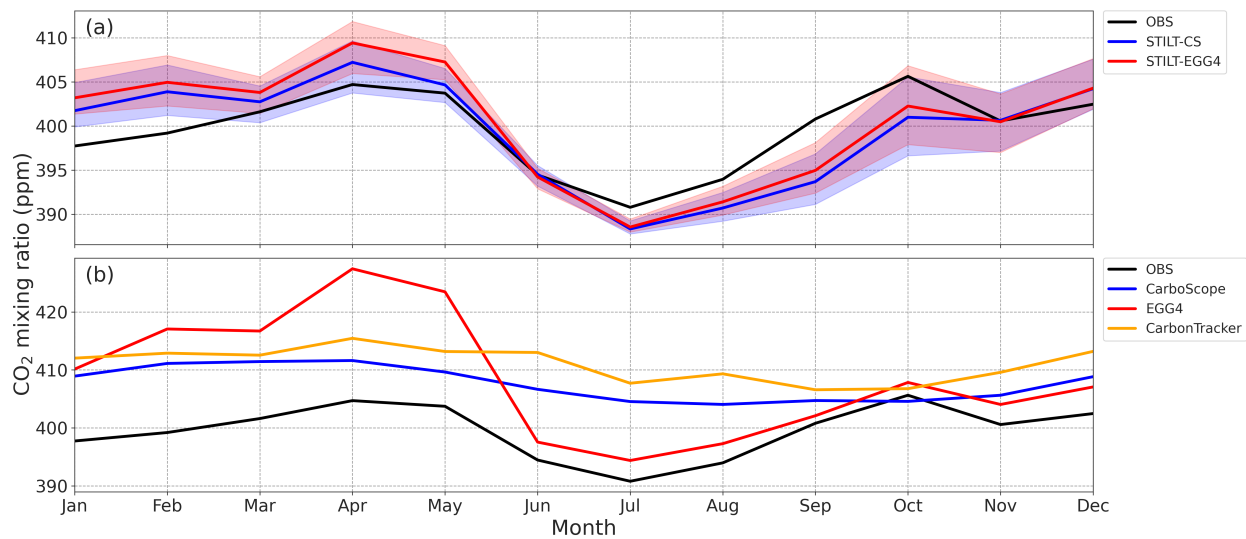

**Figure S9.** CO<sub>2</sub> seasonal cycle over SDN during 2017. Time series of monthly mean CO<sub>2</sub> over SDN with (a) STILT simulations. Blue (STILT-CS) and red (STILT-EGG4) curves represent the ensemble average of the STILT simulations using different anthropogenic fluxes. Shaded regions represent the range of the model simulations. (b) Global reanalysis products.

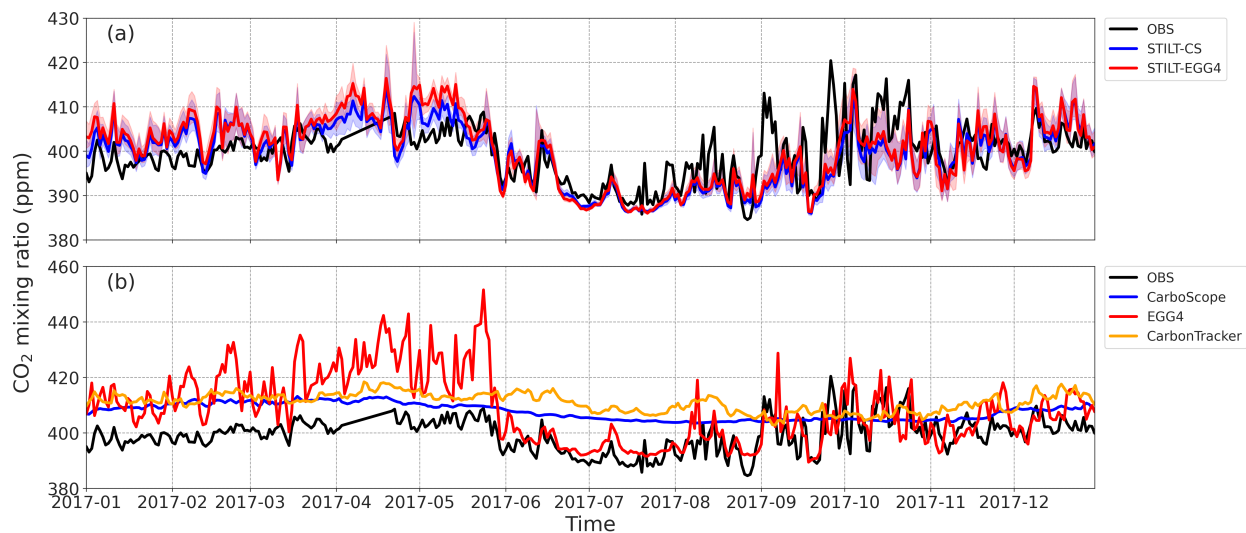

**Figure S10.** CO<sub>2</sub> daily mean time series from SDN during 2017 with (a) STILT simulations. Blue (STILT-CS) and red (STILT-EGG4) curves represent the ensemble average of the STILT simulations using different anthropogenic fluxes. Shaded regions represent the range of the model simulations. (b) Global reanalysis products.

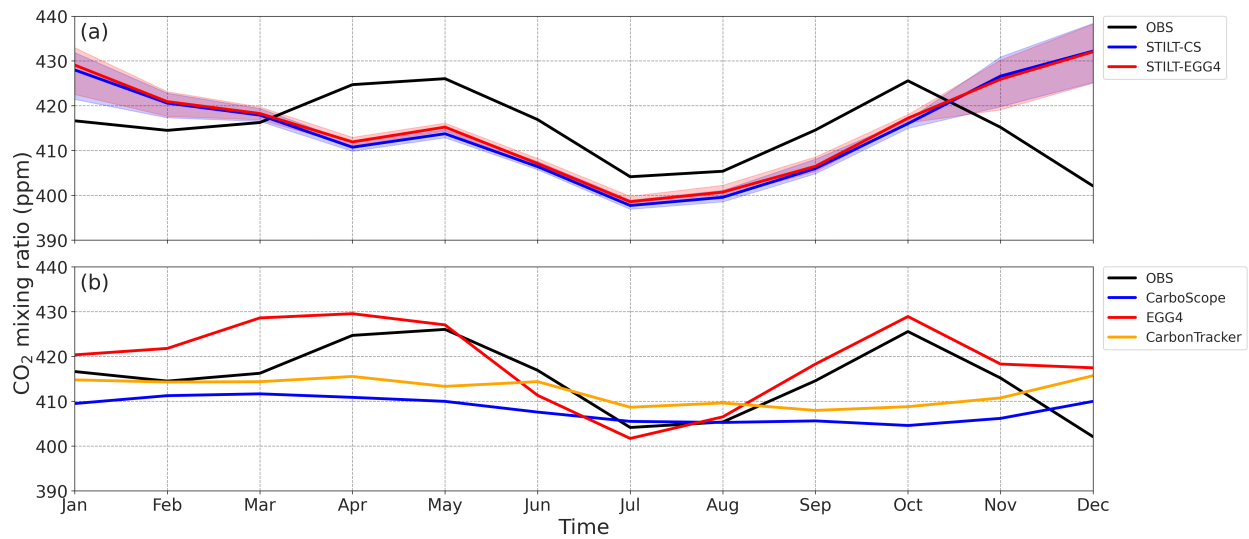

**Figure S11.** CO<sub>2</sub> seasonal cycle over NGP during 2017. Time series of monthly mean CO<sub>2</sub> over NGP with (a) STILT simulations. Blue (STILT-CS) and red (STILT-EGG4) curves represent the ensemble average of the STILT simulations using different anthropogenic fluxes. Shaded regions represent the range of the model simulations. (b) Global reanalysis products.

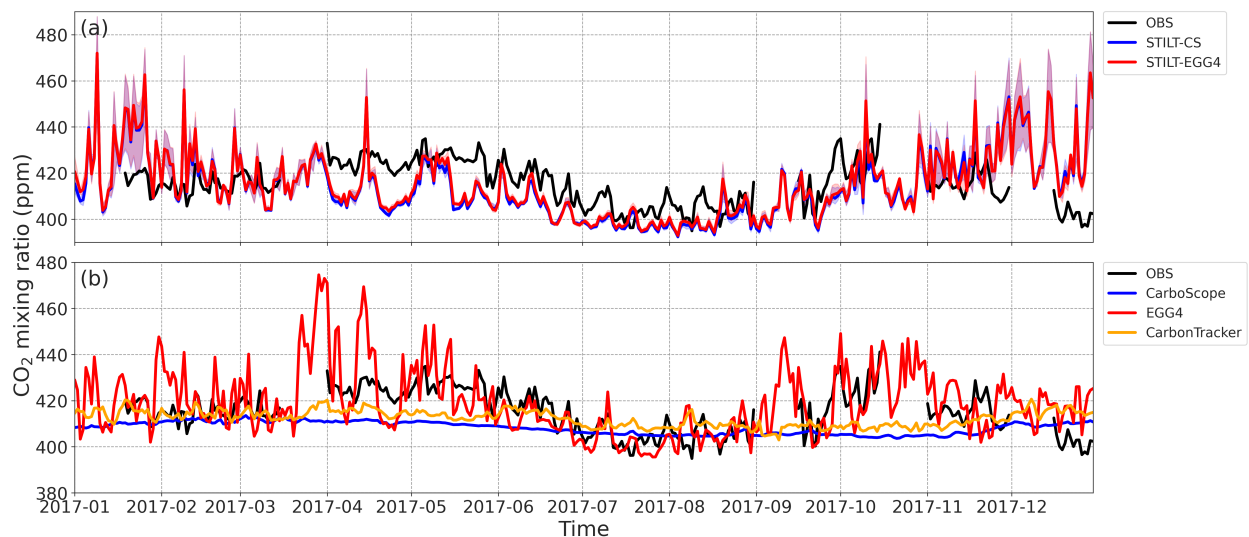

**Figure S12.** CO<sub>2</sub> daily mean time series from NGP during 2017 with (a) STILT simulations. Blue (STILT-CS) and red (STILT-EGG4) curves represent the ensemble average of the STILT simulations using different anthropogenic fluxes. Shaded regions represent the range of the model simulations. (b) Global reanalysis products.

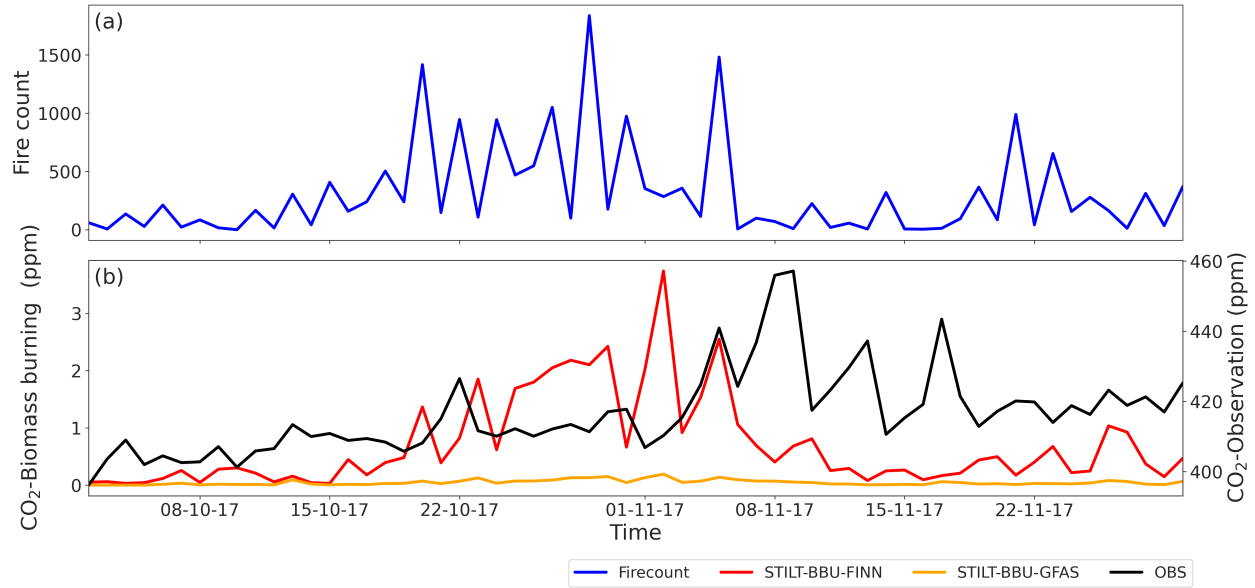

**Figure S13.** Biomass burning over MHL footprint region during October-November 2017. (a) Time series of MODIS fire counts over MHL influence region (see Fig. S1) during October-November 2017. (b) Time series of CO<sub>2</sub> daytime observations over MHL in comparison with the CO<sub>2</sub> biomass burning components from STILT simulations. The black line represents CO<sub>2</sub> daytime observations, the red line corresponds to the CO<sub>2</sub> biomass burning component from STILT-FINN, and the orange line corresponds to CO<sub>2</sub> biomass burning component from STILT-GFAS (see Sect. 6.1).

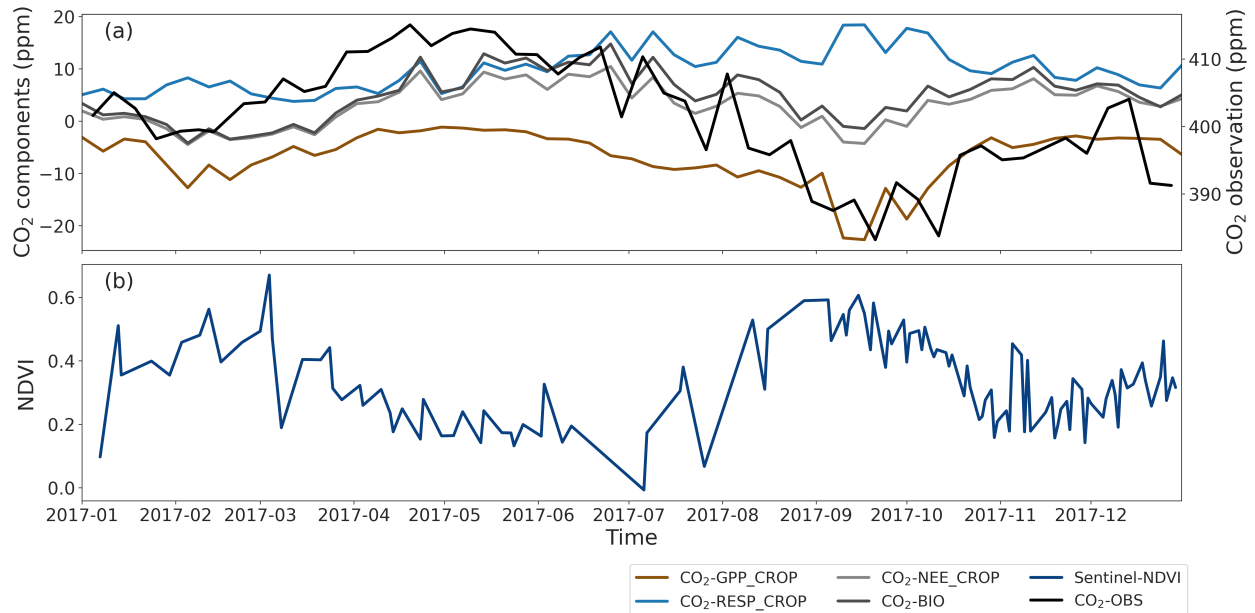

**Figure S14.** CO<sub>2</sub> variability over NTL in association with crop production. CO<sub>2</sub> observation is shown in comparison with (a) CO<sub>2</sub> biospheric components from STILT simulations. (b) NDVI estimation using Sentinel-2 data over NTL influence region (see Fig. S2) during 2017.
